# Supplementary material for: PIAS Factors from Rainbow Trout Control NF-κB- and STAT-Dependent Gene Expression
Source: MDPI journal article supplement (doi:10.3390/ijms222312815), 2021-11-26
Supplement: s1 [file s1]

**Table S1:** Cytokine-induced activation of STAT factors.

| Subfamily                                             | Teleost Cytokine   | Cognate Receptor(s)                             | Function                                              | Activated STATs                        |
|-------------------------------------------------------|--------------------|-------------------------------------------------|-------------------------------------------------------|----------------------------------------|
| <i>Fish Type II cytokines biological interactions</i> |                    |                                                 |                                                       |                                        |
| IL-2 subfamily                                        | IL-2               | IL-2R $\beta$ 1/2, IL-2/15Ra                    | Differentiation and homeostasis of T-cells            | STAT5<br>STAT3                         |
|                                                       | IL-4/13            | IL-4Ra1/2, IL-13Ra1a/ 1b                        |                                                       |                                        |
|                                                       | IL-7               | IL-7Ra                                          |                                                       |                                        |
|                                                       | IL-15              | IL-2/15Ra                                       |                                                       |                                        |
|                                                       | IL-21              | IL-21Ra1<br>IL-21Ra1                            |                                                       |                                        |
| $\beta$ -chain cytokine subfamily                     | IL-3               | IL-3R $\beta$ / IL-3R $\alpha$                  | Unknown in fish                                       | STAT5<br>STAT3                         |
|                                                       | IL-5               | IL-3R $\beta$ / IL-3R $\alpha$                  |                                                       |                                        |
|                                                       | GM-CSF             | GM-CSFR                                         |                                                       |                                        |
| IL-6 sub-family                                       | IL-6               | IL-6R                                           | Hematopoiesis                                         | STAT3                                  |
|                                                       | IL-11              |                                                 |                                                       |                                        |
|                                                       | CNTF-like M17      |                                                 |                                                       |                                        |
| IL-12 subfamily                                       | IL-12              | IL-12 R beta 1                                  | Chemotaxis and induction of TNF- $\alpha$ expression  | STAT4<br>STAT3/4<br>STAT1/3<br>STAT1/4 |
|                                                       | IL-23              | IL-12 R beta 2                                  |                                                       |                                        |
|                                                       | IL-27              | IL-23 R                                         |                                                       |                                        |
|                                                       | IL-35              | IL-27 R alpha                                   |                                                       |                                        |
|                                                       |                    | WSX-1<br>TCCR<br>gp130                          |                                                       |                                        |
| Colony-stimulating factors                            | M-CSF              | CSF-1R                                          | Inflammation                                          | STAT1<br>STAT3<br>STAT5<br>STAT6       |
| <i>Fish <math>\beta</math>-trefoil cytokines</i>      |                    |                                                 |                                                       |                                        |
|                                                       | IL-1 $\beta$       | IL-1R1, IL-1R2, DIGIRR                          | Inflammatory response, chemokine production           | STAT3                                  |
|                                                       | IL-18              | IL-18R1 and IL-18R2                             | IFN- $\gamma$ production, Th1 immunity                | STAT3                                  |
|                                                       | nIL-1Fm            | unknown                                         | Unknown                                               | unknown                                |
| <i>Type I <math>\alpha</math>-helical cytokine</i>    |                    |                                                 |                                                       |                                        |
|                                                       | IL-10, Viral IL-10 | IL-10R1/CRFB12, IL-10R2/CRFB4                   | Inflammatory response, proliferation of T and B cells | STAT3                                  |
|                                                       | IL-20L             | IL-20R                                          | Keratinocyte proliferation                            | STAT3                                  |
|                                                       | IL-22              | IL-22R1                                         | Antibacterial and antimicrobial immunity              | STAT1, STAT3, STAT5                    |
|                                                       | IL-26              | IL-26R                                          | Antibacterial and antimicrobial immunity              | STAT1, STAT3, STAT5                    |
|                                                       | IFN-a, d, e        | IFNAR1/CRFB5, IFNAR2/CRFB2                      | Apoptosis, inflammatory responds                      | STAT1, STAT3, STAT3                    |
|                                                       | IFN- $\gamma$      | IFN- $\gamma$ R1/CRFB13, IFN- $\gamma$ R2/CRFB6 | Phagocyte activation, Th1 cytokine expression         | STAT1                                  |
|                                                       | IFN- $\gamma$ rel  | CRFB17, IFN- $\gamma$ R2/CRFB6                  | Regulation of antiviral and anti-bacterial immunity   | STAT1                                  |
| <i>B-jellyroll cytokines</i>                          |                    |                                                 |                                                       |                                        |
|                                                       | TNF- $\alpha$ 1    | TNFR2, TNFR1                                    | Phagocytic activity of leucocytes                     | STAT3                                  |
|                                                       | TNF- $\alpha$ 2    | TNFR2, TNFR1                                    | T cell-mediated immunity                              | STAT3                                  |
|                                                       | TNF-N              | Unknown                                         | Unknown                                               | Unknown                                |
