# Supplementary material for: PIAS Factors from Rainbow Trout Control NF-κB- and STAT-Dependent Gene Expression
Source: MDPI journal article supplement (doi:10.3390/ijms222312815), 2021-11-26
Supplement: s1 [file s1]

**Table S2:** Regulatory activities of the human PIAS proteins.

| PIAS Family Member | Interaction Partner | Involved Domain/Motif | Function                                                |
|--------------------|---------------------|-----------------------|---------------------------------------------------------|
| PIAS1              | AR                  | 1-318                 | Sumoylates AR, co-activator or repressor                |
|                    | ER-alpha            | ND                    | Transcriptional activator                               |
|                    | MR                  | ND                    | Sumoylates MR, transcriptional repression               |
|                    | PPAR-y              | ND                    | Sumoylation, transcriptional repression                 |
|                    | SF1                 | ND                    | Sumoylation, inhibits transcriptional synergy           |
|                    | GATA4               | ND                    | Sumoylation                                             |
|                    | SP3                 | ND                    | Sumoylation, transcriptional repression                 |
|                    | DNMT3A              | ND                    | Sumoylation, releases transcriptional repression        |
|                    | COUP-TFI            | 406-503               | Co-activator                                            |
|                    | NID                 | ND                    | Sumoylation, transcriptional repression                 |
|                    | ZNF76               | 1-277                 | Sumoylation, releases inhibition of ZNF76 on TBP        |
|                    | BKLF                | ND                    | Sumoylation, transcriptional repression                 |
|                    | AXIN                | ND                    | Sumoylation, JNK activation                             |
|                    | Dynamin             | ND                    | Sumoylation, endocytosis                                |
|                    | FAK                 | ND                    | Sumoylation, activates autophosphorylation of FAK       |
| PIAS2              | SNM1A               | ND                    | Proper nuclear localization and DNA repair              |
|                    | CRP2                | ND                    | ND                                                      |
|                    | AR                  | RLD                   | Sumoylates AR, activator or repressor                   |
|                    | GR                  | RLD                   | Transcriptional repression                              |
|                    | PPAR-y              | ND                    | Sumoylation, transcriptional repression                 |
|                    | GRIP1               | RLD                   | Transcriptional co-activator                            |
|                    | DJ1                 | 433-493               | DJ1 releases PIASx- $\alpha$ -mediated repression on AR |
|                    | SF1                 | ND                    | Sumoylation, regulates nuclear localization             |
|                    | HDAC3               | ND                    | Relieves transcriptional repression by HDAC3            |
| PIAS3              | DNMT3A              | ND                    | Sumoylation, releases transcriptional repression        |
|                    | BKLF                | ND                    | Sumoylation, transcriptional repression                 |
|                    | AXIN                | ND                    | Sumoylation, JNK activation                             |
|                    | AR                  | ND                    | Transcriptional repression                              |
|                    | MR                  | 444-583               | Transcriptional repression                              |
|                    | TIF2                | 353-546               | Modulates TIF2 activity in NR signaling                 |
| PIAS4              | SF1                 | ND                    | Sumoylation, inhibits transcriptional synergy           |
|                    | p300                | ND                    | Activates SMAD3-mediated transcription                  |
|                    | HMGI-C              | ND                    | Transcriptional repression                              |
|                    | AR                  | 336-406               | AR corepressor                                          |
|                    | PR                  | ND                    | Transcriptional repression                              |
| PIAS4              | NURR1               | ND                    | Sumoylation, transcriptional repression                 |
|                    | SF1                 | ND                    | Sumoylation, regulates nuclear localization             |
|                    | HDAC1, -2           | 1-90                  | Represses SMAD3- and AR-mediated transcription          |
|                    | GATA1               | ND                    | Sumoylation, transcriptional repression                 |
|                    | GATA2               | 1-157, 414-510        | Sumoylation, transcriptional repression                 |
|                    | C/EBP- $\alpha$     | ND                    | Sumoylation, inhibits transcriptional synergy           |
|                    | TCF4                | ND                    | Sumoylation, transcriptional activation                 |
|                    | TRAF6               | SAP/PINIT             | Sumoylation, transcriptional regulation                 |

**Abbreviations:** AR, androgen receptor; AXIN, axis inhibitor; BKLF, basic Krüppel-like factor; CBP, cyclic-AMP-responsive-element-binding protein (CREB)-binding protein; C/EBP- $\alpha$ , CCAAT/enhancer binding protein- $\alpha$ ; COUP-TFI, chicken ovalbumin upstream-promoter-transcription factor 1; CRP2, cysteine-rich protein 2; DNMT3A, DNA methyltransferase 3A; ER- $\alpha$ , oestrogen receptor- $\alpha$ ; FAK, focal adhesion kinase; GATA, GATA-binding protein; GBP, GU/RH-II-binding protein; GR, glucocorticoid receptor; GRIP1, glutamate-receptor-interacting protein 1; GU/RH-II, nucleolar RNA helicase GU/RNA helicase II; HDAC, histone deacetylase; HMGI-C, high-mobility group protein isoform I-C; JNK, JUN amino-terminal kinase; MIZ1, MSX-interacting zinc finger 1; MR, mineralocorticoid receptor; MSX2, MSH-homeobox homologue 2; ND, not determined; NID, net inhibitory domain; NR, nuclear receptor; NURR1, nuclear-receptor-related protein 1; PIAS, protein inhibitor of activated STAT (signal transducer and activator of transcription protein); PPAR- $\gamma$ , peroxisome-proliferative-activated receptor- $\gamma$ ; PR, progesterone receptor; RLD, RING-finger-like zingbinding domain; SF1, steroidogenic factor 1; SMAD, SMA (small body size)- and MAD (mothers against decapentaplegic)- related protein; TBP, TATA-binding protein; TCF4, T-cell-specific transcription factor 4; TIF2, transcriptional intermediary factor 2; ZNF76, zinc-finger protein 76.
